# Supplementary material for: A Randomized Controlled Clinical Trial of Lifestyle Intervention and Pioglitazone for Normalization of Glucose Status in Chinese with Prediabetes
Source: Hindawi journal article supplement (doi:10.1155/2022/2971382), 2022-01-06

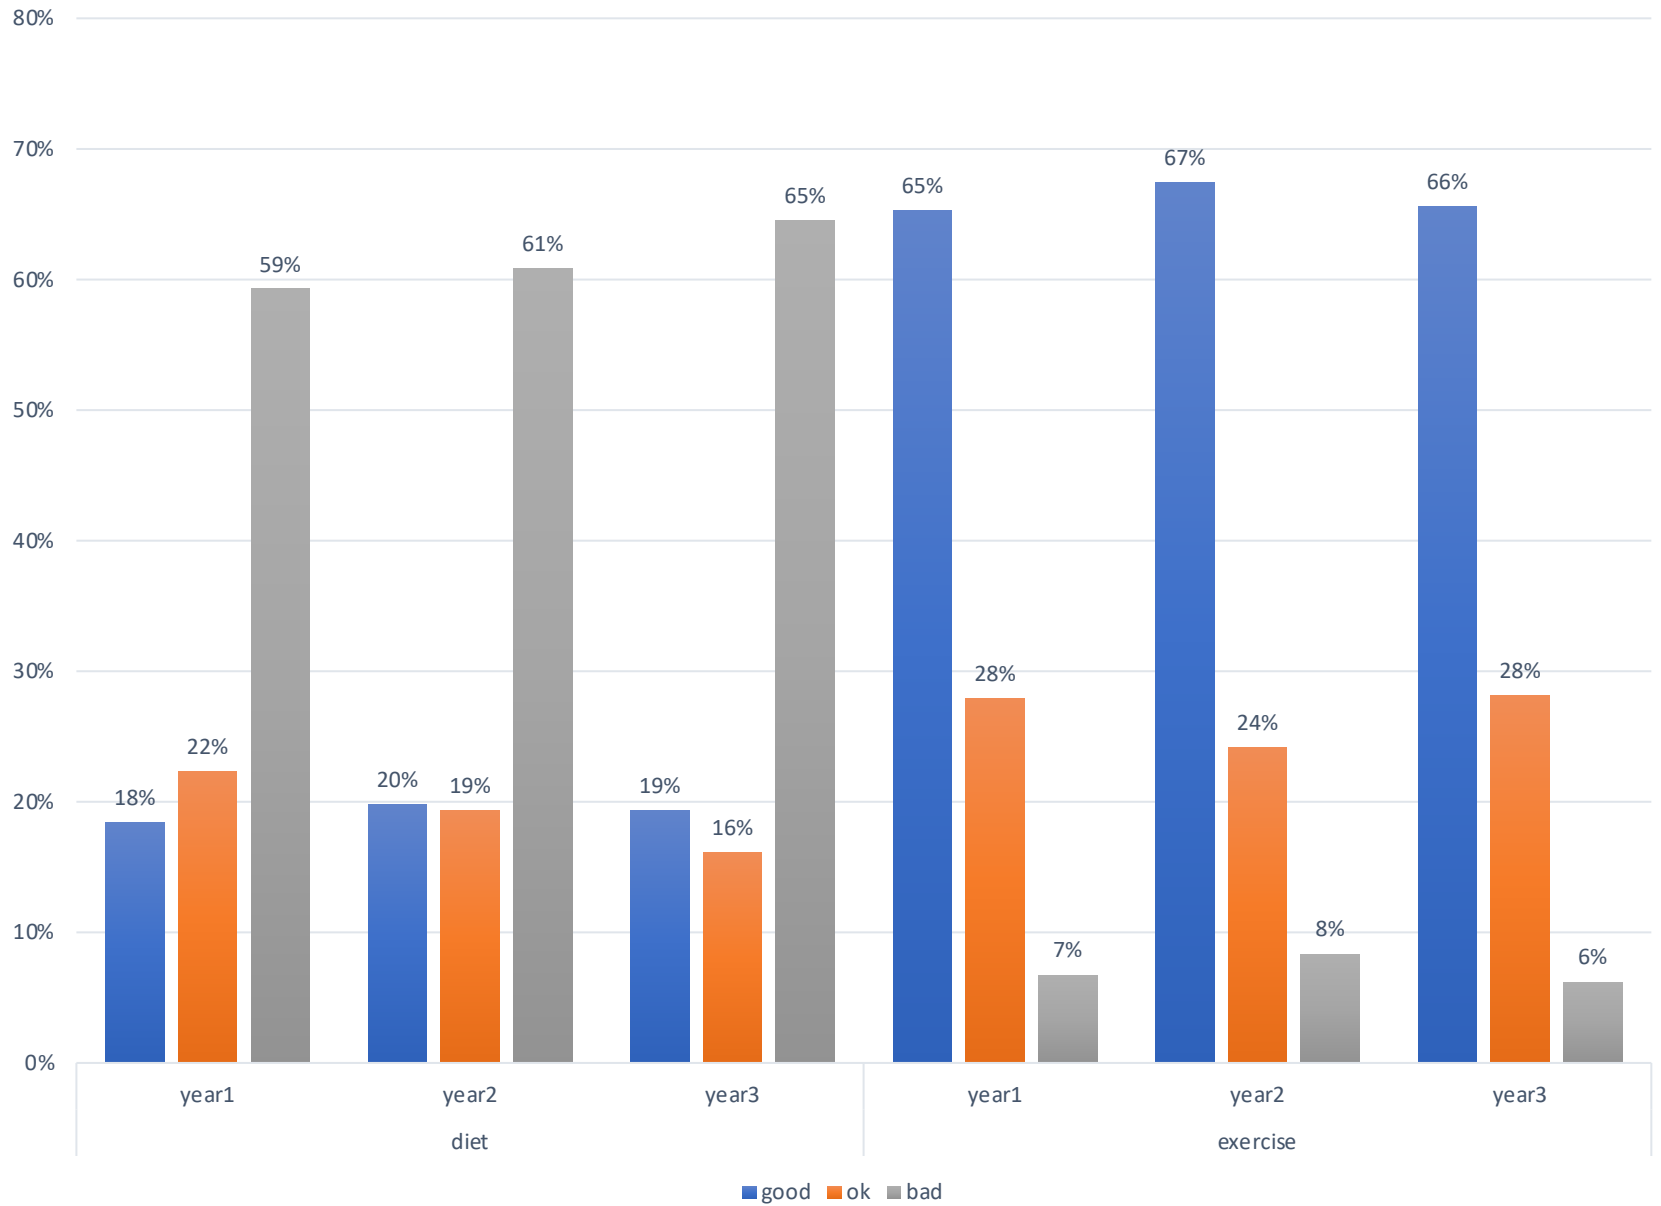

Supplement: f1 [file 2971382.f1.pdf]
